# Supplementary material for: Free energy change in the complete transport of all water molecules through a carbon nanotube
Source: Royal Society of Chemistry journal article supplement (doi:10.1039/d2cp04666k), 2023-01-01
Supplement: d2cp04666k1.pdf [file d2cp04666k1.pdf]

## Supplementary Information

### Free Energy Change in the Complete Transport of All Water Molecules through a Carbon Nanotube

Youngjun Kwon<sup>1</sup> and Changsun Eun<sup>1,a)</sup>

<sup>1</sup> Department of Chemistry, Hankuk University of Foreign Studies, Yongin 17035, Republic of Korea

---

<sup>a)</sup> To whom correspondence should be addressed. Electronic mail: [ceun@hufs.ac.kr](mailto:ceun@hufs.ac.kr)



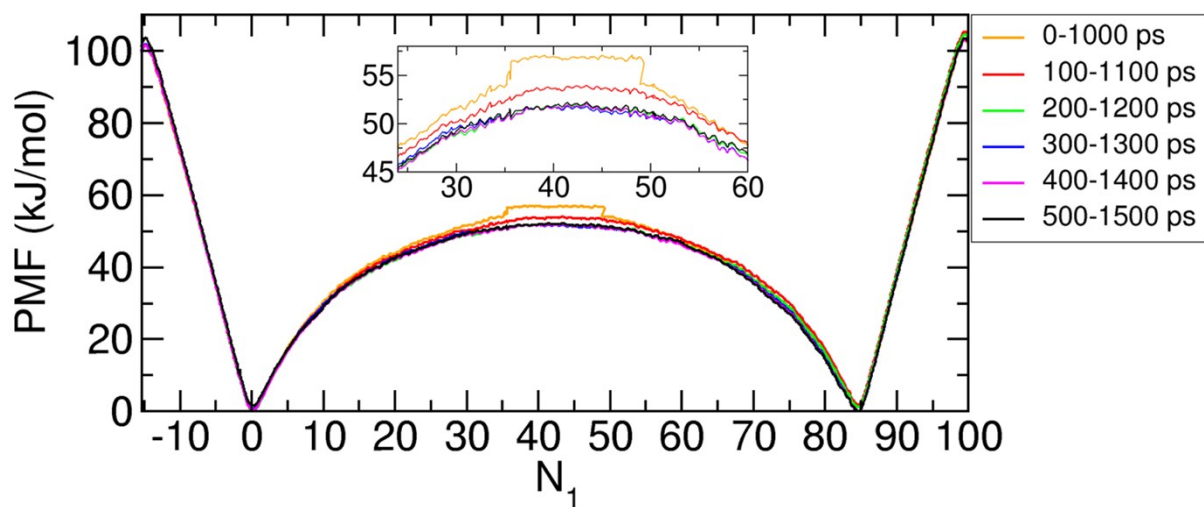

**Figure S1.** Convergence test of the PMF calculation for the case with 100 water molecules. Six PMFs were obtained by taking only a 1 ns trajectory from the total 1.5 ns trajectory of each sampling window, beginning at 0 ps, 100 ps, 200 ps, 300 ps, 400 ps, or 500 ps. As the beginning time for sampling is increased, the PMF converges. The inset shows the details of this convergence around  $N_1 \approx 40$ .

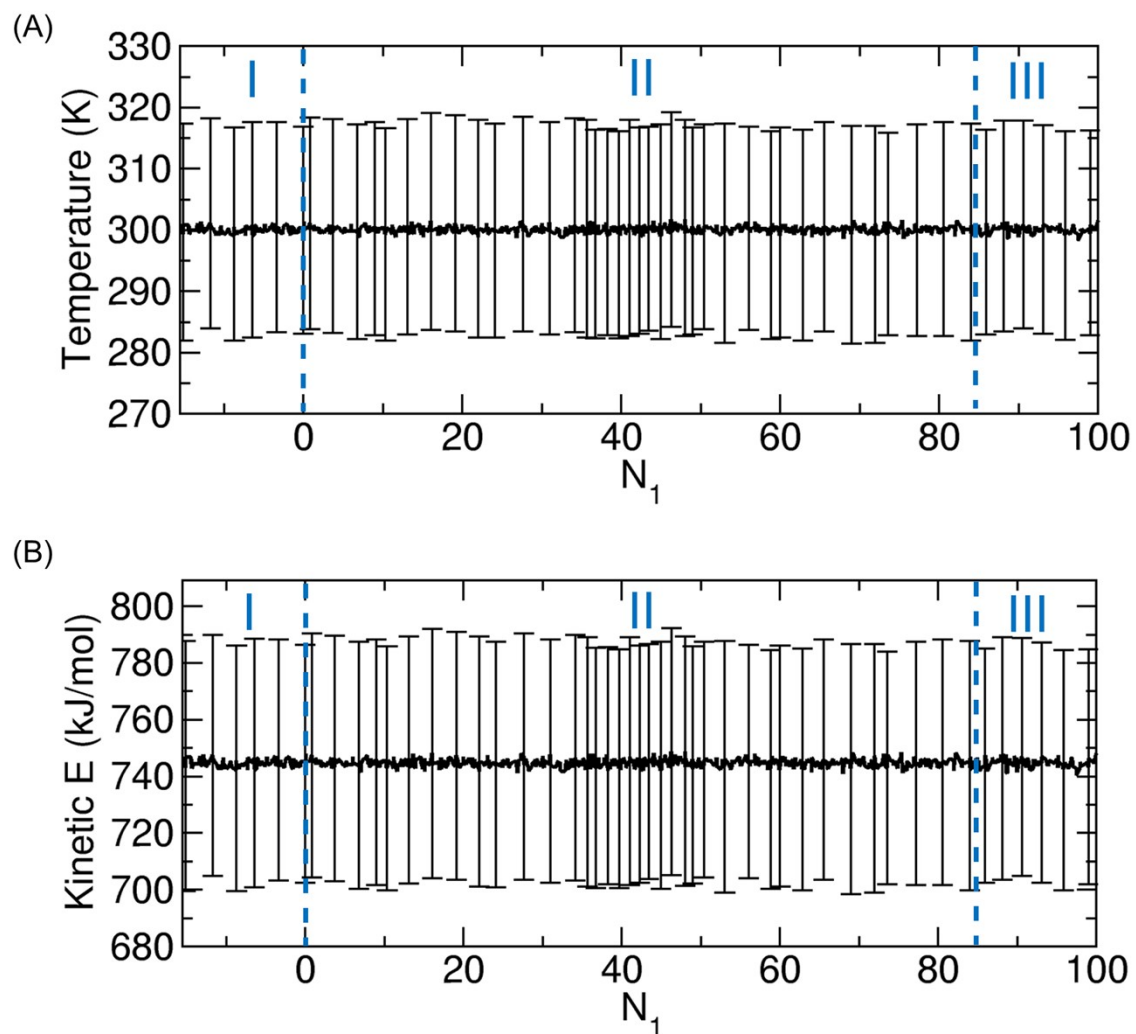

**Figure S2.** (A) Temperature as a function of  $N_1$  for the case with 100 water molecules. (B) Kinetic energy (Kinetic E) as a function of  $N_1$  for the case with 100 water molecules. The error bars represent standard deviations.
